# Supplementary material for: Metabolic nuclear receptors coordinate energy metabolism to regulate Sox9+ hepatocyte fate
Source: PubMed Central journal article supplement (PMC8417399; doi:10.1016/j.isci.2021.103003), 2021-08-19
Supplement: mmc1.pdf [file mmc1.pdf]

iScience, Volume 24

## **Supplemental information**

### **Metabolic nuclear receptors coordinate energy metabolism to regulate Sox9<sup>+</sup> hepatocyte fate**

**Shenghui Liu, Dan Qin, Yi Yan, Jiayan Wu, Lihua Meng, Wendong Huang, Liqiang Wang, Xiangmei Chen, and Lisheng Zhang**

## Supplemental information

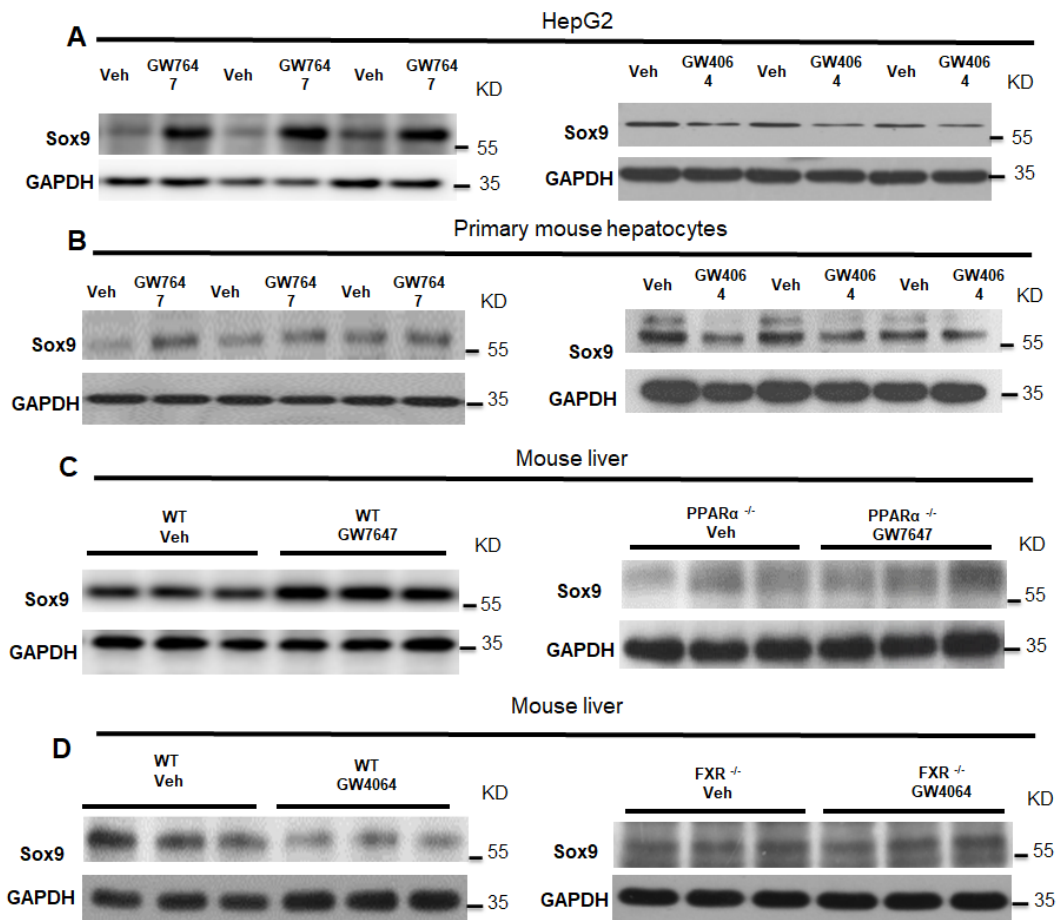

**Figure S1. Activation of PPAR $\alpha$  or FXR regulates the expression of Sox9 in vitro and in vivo, related to Figure 1 and 2.**

(A) Sox9-Immunoblot analysis in HepG2 cells.

(B) Sox9-Immunoblot analysis in primary mouse hepatocytes cells.

(C) Sox9-Immunoblot analysis of liver samples.

(D) Sox9-Immunoblot analysis of liver samples.

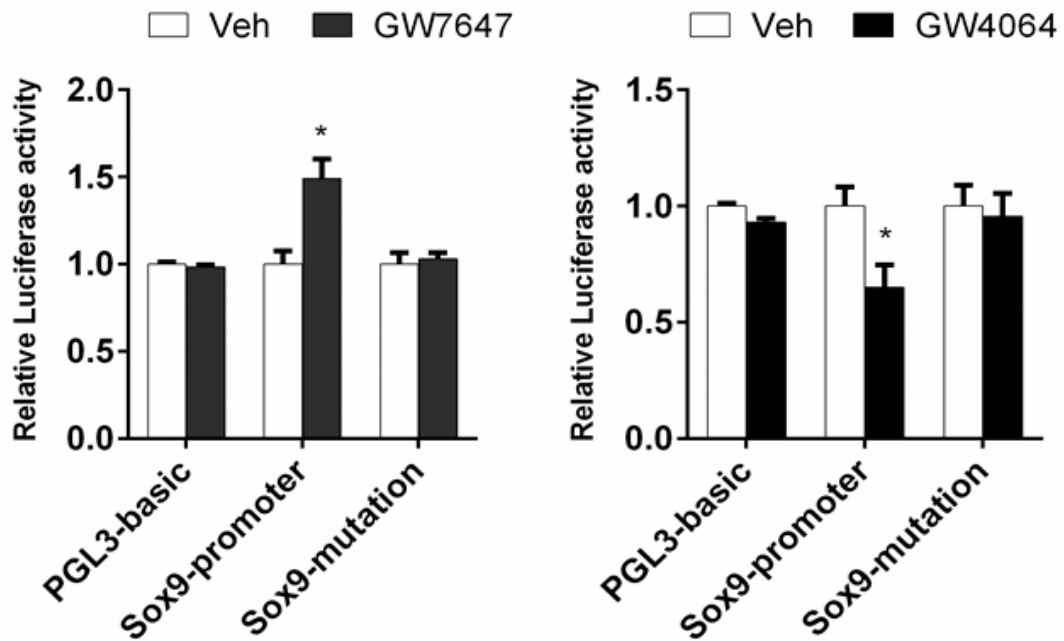

**Figure S2. Sox9 is a target of PPAR $\alpha$  and FXR, related to Figure 3.**

Functional role of IR9 motif in the regulatory region of mouse Sox9 for PPAR $\alpha$  and FXR activity in Hep1-6 cells. Data are expressed as means  $\pm$  SD. Comparisons between two groups were performed using the two-tailed Student's t-test. Significant difference is presented at the levels of \* $p < 0.05$  and \*\* $p < 0.01$ .

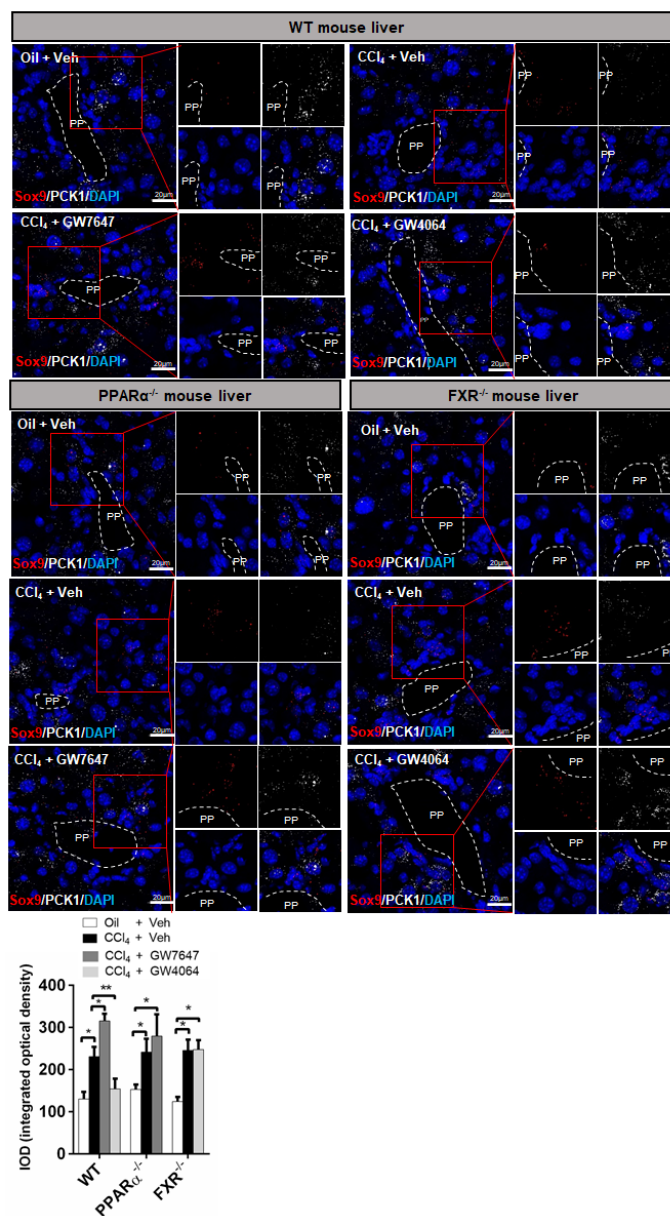

**Figure S3. Activation of PPAR $\alpha$  or FXR regulates the expression of Sox9 in vivo, related to Figure 4.**

Representative images from RNAscope® assays for Sox9 mRNA levels in the indicated groups. Graph show quantification of the integrated optical density (IOD) in the indicated groups (n = 5). Scale bar represents 20 $\mu$ m. Data are expressed as means  $\pm$  SD. Comparisons between multiple groups were performed using ordinary one-way ANOVA with the Dunnett's multiple comparison test. Significant difference is presented at the levels of \*p < 0.05 and \*\*p < 0.01.

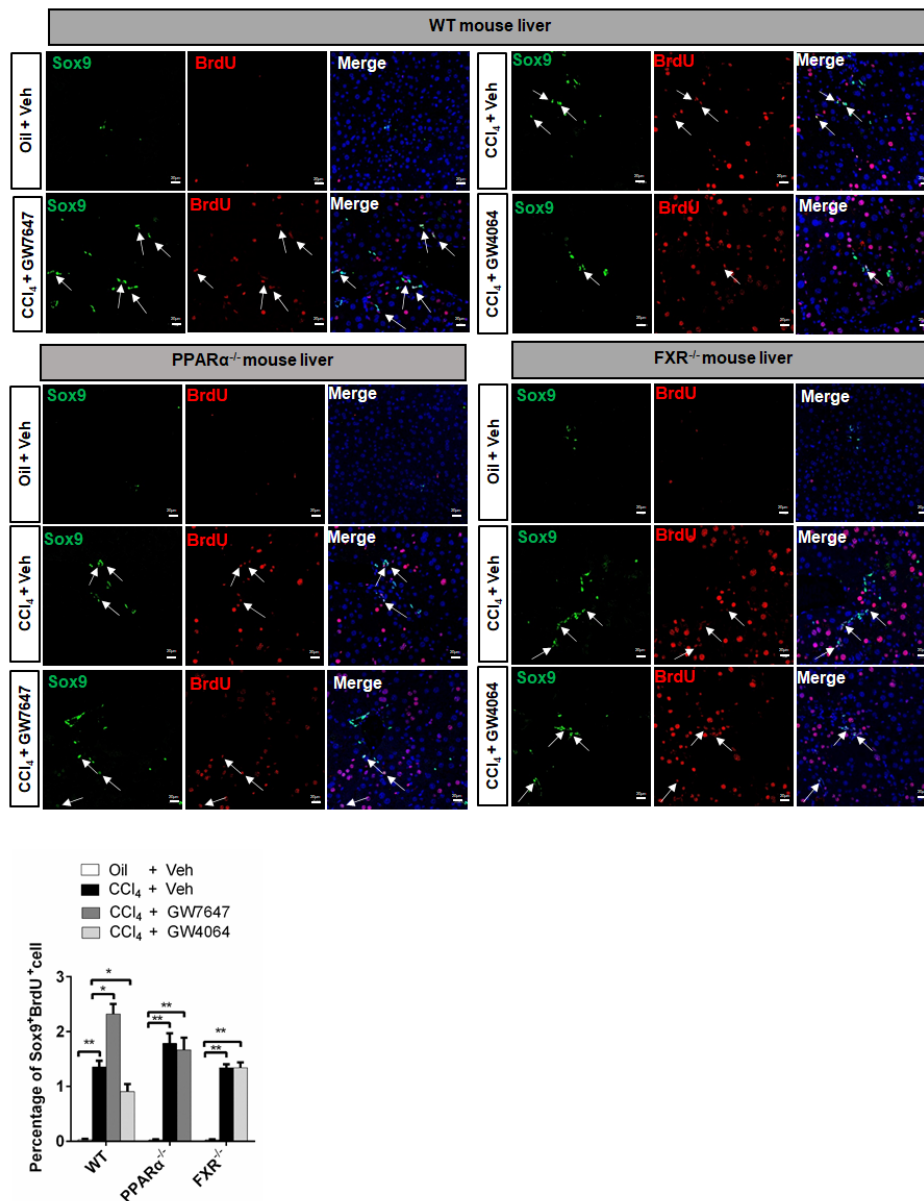

**Figure S4. PPAR $\alpha$  promotes, but FXR prevents proliferation of Sox9<sup>+</sup> BrdU<sup>+</sup> cells in CCl<sub>4</sub>-induced chronic liver injury model, related to Figure 5.**

The model of CCl<sub>4</sub>-induced chronic liver injury was described in Fig. 4A. Sox9/BrdU staining was performed. Arrows depict Sox9<sup>+</sup>BrdU<sup>+</sup> cells. Graphs show percentages of Sox9<sup>+</sup>BrdU<sup>+</sup> cells in the indicated groups (n=5). Scale bar represents 20 $\mu$ m. Data are expressed as means  $\pm$  SD. Comparisons between multiple groups were performed using ordinary one-way ANOVA with the Dunnett's multiple comparison test. Significant difference is presented at the levels of \*p < 0.05 and \*\*p < 0.01.

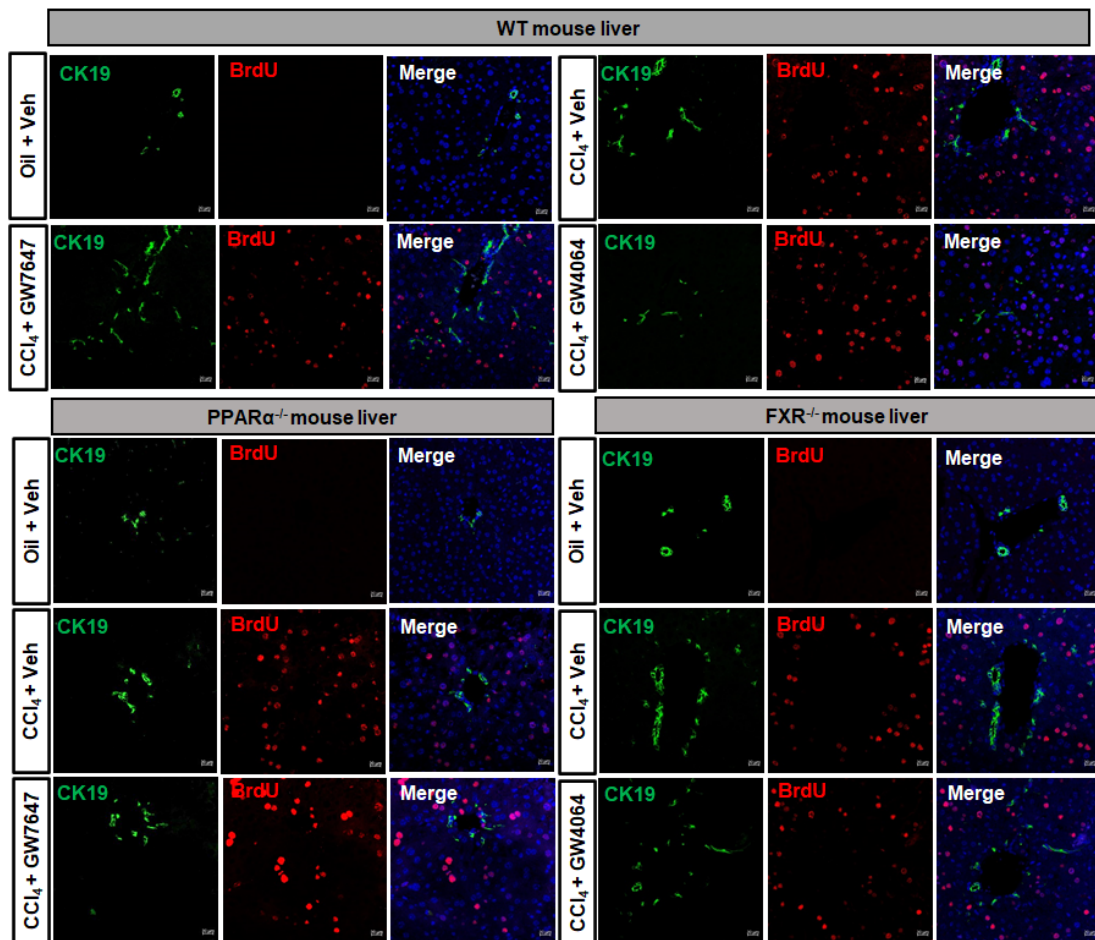

**Figure S5. Few CK19<sup>+</sup> BrdU<sup>+</sup> cells in CCl<sub>4</sub>-induced chronic liver injury model, related to Figure 5.**

The model of CCl<sub>4</sub>-induced chronic liver injury was described in Fig. 4A. CK19/BrdU staining was performed. Scale bar represents 20µm.

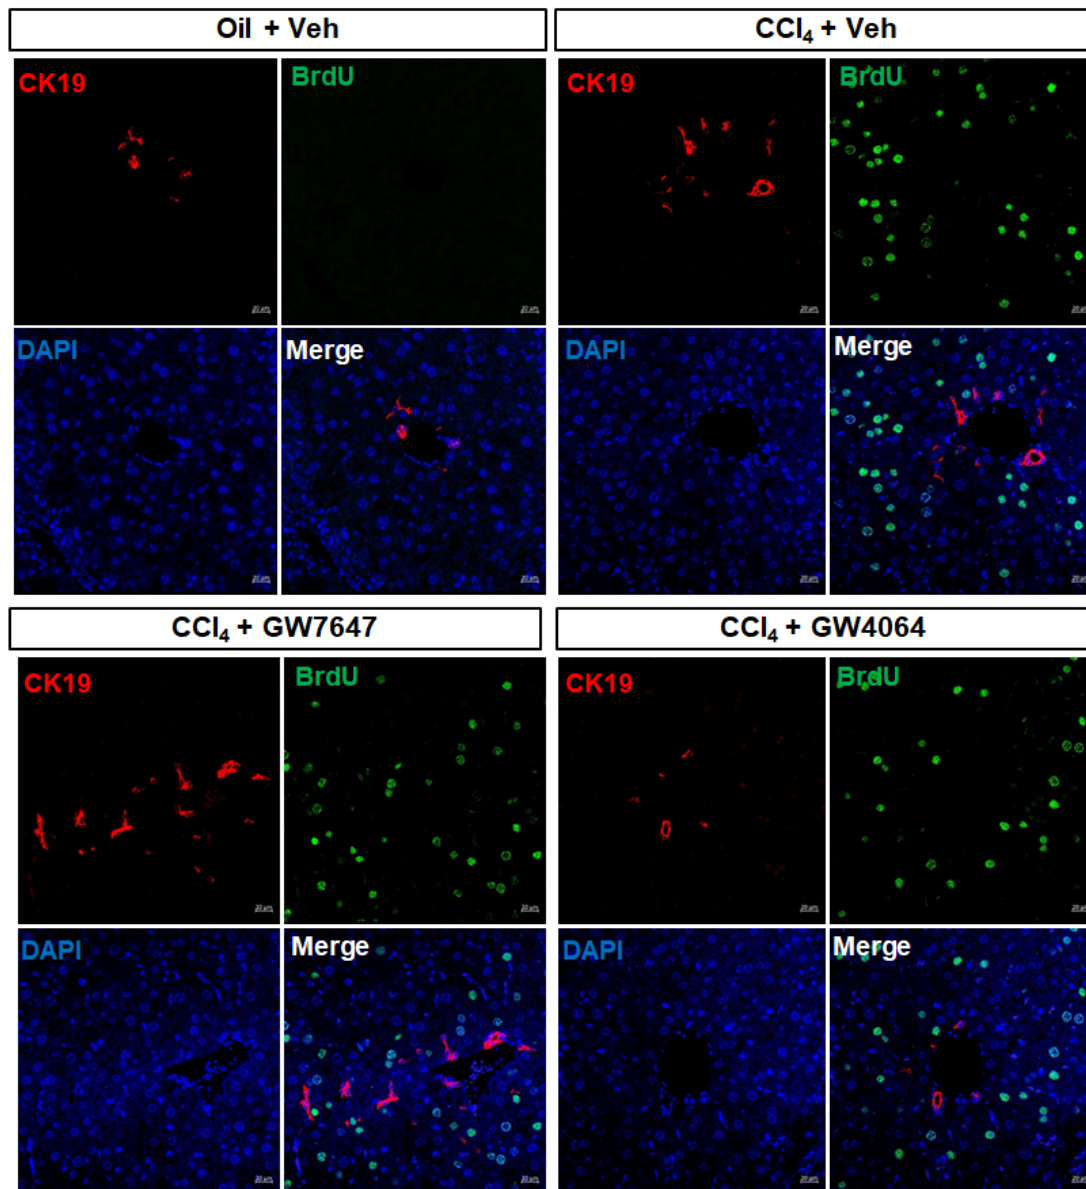

**Figure S6. Few CK19<sup>+</sup> BrdU<sup>+</sup> cells after CCl<sub>4</sub>-induced chronic liver injury in Sox9-CreERT2; Rosa26-mTmG mice, related to Figure 7.**

The model of CCl<sub>4</sub>-induced chronic liver injury was described in Fig. 6B. CK19/BrdU staining was performed. Scale bar represents 20µm.

**Table S1. The primer sequences for qPCR, EMSA, ChIP and Plasmid Construction, related to STAR Methods.**

| Name      | Application | Sequence (5'-3')      |
|-----------|-------------|-----------------------|
| H-Cpt1a-F | qPCR        | CATTCAGGCAGCAAGAGC    |
| H-Cpt1a-R | qPCR        | CAGCAGCCGCCCATCATG    |
| H-GAPDH-F | qPCR        | CTCTGGTAAAGTGGATATTG  |
| H-GAPDH-R | qPCR        | GGTGAATCATATTGGAAC    |
| H-Acox1-F | qPCR        | GTATGGAATCAGTCAGAACGC |
| H-Acox1-R | qPCR        | CTTGTAAGATTCGTGGACCTC |
| H-SHP-F   | qPCR        | CCCAAGATGCTGTGACCTTT  |
| H-SHP-R   | qPCR        | CCAGAAGGACTCCAGACAGC  |
| H-Sox9-F  | qPCR        | ACCGACGAGCAGGAGAAGGG  |
| H-Sox9-R  | qPCR        | GCGGATGCACACGGGGAACT  |
| H-PDK4-F  | qPCR        | GTGATGTGGTAGCAGTGGTC  |
| H-PDK4-R  | qPCR        | TCTATTGGTGTAAAGGAAGG  |
| M-PDK4-F  | qPCR        | GAGCATCAAGAAAACCGT    |
| M-PDK4-R  | qPCR        | ATAACCAAAAACCAGCCAA   |
| M-36B4-F  | qPCR        | TGGAGACAAGGTGGGAGCC   |
| M-36B4-R  | qPCR        | CACAGACAATGCCAGGACGC  |
| M-Acox1-F | qPCR        | CTGAAATCAAGAGAAGCGAG  |
| M-Acox1-R | qPCR        | GAGAAAGTGGAAAGGCATAGG |
| M-Cpt1a-F | qPCR        | ACCTATTTCGTCTTCTGGGAT |
| M-Cpt1a-R | qPCR        | GTGTTGGATGGTGTCTGTCT  |
| M-SHP-F   | qPCR        | CGATCCTCTTCAACCCAGATG |
| M-SHP-R   | qPCR        | AGGGCTCCAAGACTTCACACA |
| M-Sox9-F  | qPCR        | TGCAAGCTGGCAAAGTTGAT  |
| M-Sox9-R  | qPCR        | TCAGTTCACCGATGTCCACG  |



|                       |                         |                                                 |
|-----------------------|-------------------------|-------------------------------------------------|
| Sox9-probe-F(Labeled) | EMSA                    | AGTTCAAGGTCGGCGTGGCCC                           |
| Sox9-probe-R(Labeled) | EMSA                    | GGGCCACGCCGACCTTGAAC                            |
| Sox9-probe-F(Mut)     | EMSA                    | CTACCAAGGTCGGCGCATGCC                           |
| Sox9-probe-R(Mut)     | EMSA                    | GGCATGCGCCGACCTTGGTAG                           |
| Sox9- probe-F(Cold)   | EMSA                    | AGTTCAAGGTCGGCGTGGCCC                           |
| Sox9- probe-R(Cold)   | EMSA                    | GGGCCACGCCGACCTTGAAC                            |
| M-Sox9-IR9-F          | ChIP                    | AGTGGCGAGCCTGACGGTGTGGTG                        |
| M-Sox9-IR9-R          | ChIP                    | CCGTGGGCCACGCCGACCTTGAAC                        |
| M-SOX9-PGL3-F         | Plasmid<br>Construction | CGACGCGTCTCCCTACCTCAAGCCTG<br>AAGAAT            |
| M-SOX9- PGL3-R        | Plasmid<br>Construction | GAAGATCTGAACCAGCCGAGTCCTCC<br>GACATG            |
| M-SOX9-PGL3-Mut-F     | Plasmid<br>Construction | ACTTGTCTACCAAGGTCGGCGCATG<br>CCACGGGACCGGCCGCA  |
| M-SOX9- PGL3-Mut -R   | Plasmid<br>Construction | TGCGGCCGGTCCCGTGGCATGCGCC<br>GACCTTGGTAGGACAAGT |

H: Human

M: Mouse

F: Forward

R: Reverse

**Table S2. The probe information for RNAscope® assay, related to STAR Methods.**

| Official symbol | Cat No.       | SOURCE         | Gene ID   | Genbank nucleotide accession number | Channel | Detection Kit                    |
|-----------------|---------------|----------------|-----------|-------------------------------------|---------|----------------------------------|
| Sox9            | 40105<br>1-C3 | www.acdbio.com | 2068<br>2 | NM_011448<br>.4                     | C3      | RNAscope®<br>Multiple<br>x       |
| Pck1            | 45802<br>1    | www.acdbio.com | 1853<br>4 | NM_011044<br>.2                     | C1      | Fluorescent<br>Reagent<br>Kit v2 |
